# Supplementary material for: The Neuroimmune Response to Surgery – An Exploratory Study of Trauma-Induced Changes in Innate Immunity and Heart Rate Variability
Source: PubMed Central journal article supplement (PMC9301672; doi:10.3389/fimmu.2022.911744), 2022-07-07
Supplement: DataSheet_1.pdf [file DataSheet_1.pdf]

| Pearson Correlation Coefficients<br>Prob >  r  under H0: Rho=0<br>Number of Observations |                          |                          |                          |                          |                          |                          |                          |
|------------------------------------------------------------------------------------------|--------------------------|--------------------------|--------------------------|--------------------------|--------------------------|--------------------------|--------------------------|
|                                                                                          | rMSSD                    | SD1                      | HFLomb                   | IIQTVI                   | LF_Lomb                  | LF_HF                    | SDNN                     |
| rMSSD                                                                                    | 1.00000<br><.0001<br>22  | 0.99714<br><.0001<br>22  | 0.91573<br><.0001<br>22  | -0.48028<br>0.0237<br>22 | 0.86142<br><.0001<br>22  | -0.20374<br>0.3631<br>22 | 0.95732<br><.0001<br>22  |
| SD1                                                                                      | 0.99714<br><.0001<br>22  | 1.00000<br><.0001<br>22  | 0.93427<br><.0001<br>22  | -0.49643<br>0.0188<br>22 | 0.88493<br><.0001<br>22  | -0.19079<br>0.3950<br>22 | 0.95493<br><.0001<br>22  |
| HFLomb                                                                                   | 0.91573<br><.0001<br>22  | 0.93427<br><.0001<br>22  | 1.00000<br><.0001<br>22  | -0.46112<br>0.0308<br>22 | 0.92308<br><.0001<br>22  | -0.26251<br>0.2379<br>22 | 0.86231<br><.0001<br>22  |
| IIQTVI                                                                                   | -0.48028<br>0.0237<br>22 | -0.49643<br>0.0188<br>22 | -0.46112<br>0.0308<br>22 | 1.00000<br>0.0847<br>25  | -0.37591<br>0.0847<br>22 | 0.13323<br>0.5545<br>22  | -0.58395<br>0.0022<br>25 |
| LF_Lomb                                                                                  | 0.86142<br><.0001<br>22  | 0.88493<br><.0001<br>22  | 0.92308<br><.0001<br>22  | -0.37591<br>0.0847<br>22 | 1.00000<br>0.08800<br>22 | 0.08800<br>0.6970<br>22  | 0.86784<br><.0001<br>22  |
| LF_HF                                                                                    | -0.20374<br>0.3631<br>22 | -0.19079<br>0.3950<br>22 | -0.26251<br>0.2379<br>22 | 0.13323<br>0.5545<br>22  | 0.08800<br>0.6970<br>22  | 1.00000<br>0.7610<br>22  | -0.06879<br>0.7610<br>22 |
| SDNN                                                                                     | 0.95732<br><.0001<br>22  | 0.95493<br><.0001<br>22  | 0.86231<br><.0001<br>22  | -0.58395<br>0.0022<br>25 | 0.86784<br><.0001<br>22  | -0.06879<br>0.7610<br>22 | 1.00000<br>0.7610<br>25  |

**Supplementary Figure 1. Correlation matrix of HRV variables .** Preoperative values.

SDNN, standard deviation of normal-normal heart beats; rMSSD, root mean square of successive differences; LF Lomb, low frequency by Lomb periodogram; HF, high frequency by Lomb; SD1, Standard deviation of Poincaréplot perpendicular to line of identity (instantaneous variability); IIQTVI, QT Variability Index from ECG lead II.
