# Supplementary material for: The Neuroimmune Response to Surgery – An Exploratory Study of Trauma-Induced Changes in Innate Immunity and Heart Rate Variability
Source: PubMed Central journal article supplement (PMC9301672; doi:10.3389/fimmu.2022.911744), 2022-07-07
Supplement: DataSheet_3.pdf [file DataSheet_3.pdf]

### Intermediate monocytes

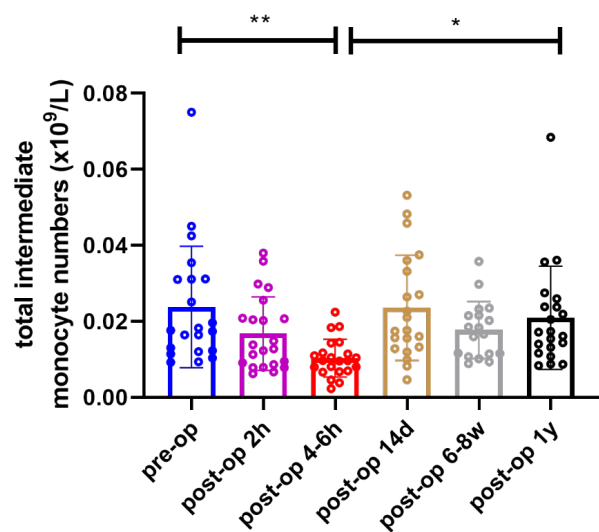

### Non-classical monocytes

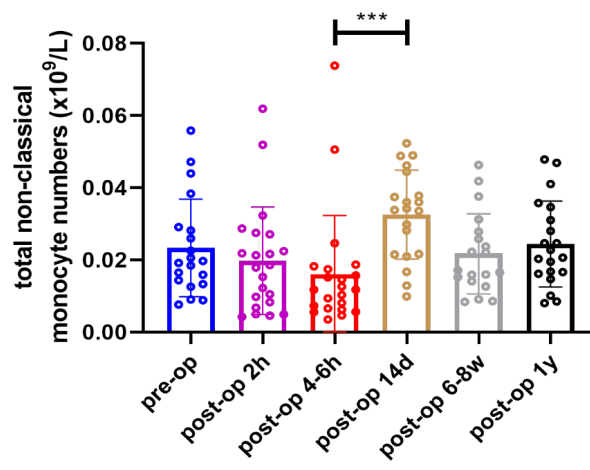

### Classical monocytes

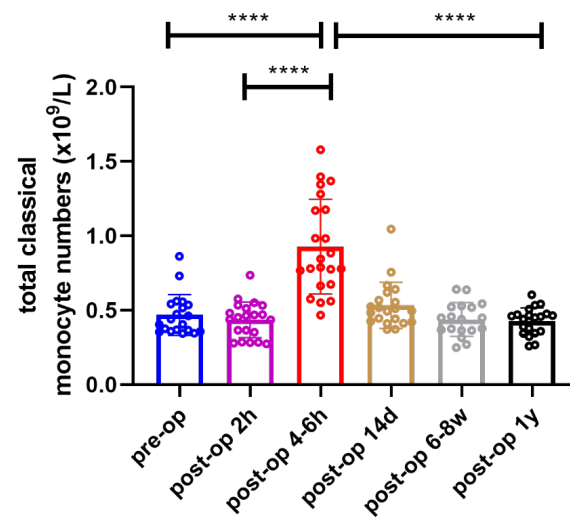

Supplementary Figure 3. Monocyte subtype data.
