# Supplementary material for: The Neuroimmune Response to Surgery – An Exploratory Study of Trauma-Induced Changes in Innate Immunity and Heart Rate Variability
Source: PubMed Central journal article supplement (PMC9301672; doi:10.3389/fimmu.2022.911744), 2022-07-07

**Supplementary Figure 4. Individual trajectories of key drivers behind differences in PC2.**

PC2, Principal Component 2; TGF- $\alpha$ , Transforming growth factor alpha; EN-RAGE also referred to as S100A12; CX3CL1, C-X3-C Motif Chemokine Ligand 1 or Fractalkine; MMP-1, Matrix metalloproteinase-1; NT-3, Neurotrophin-3; CXCL6, Chemokine (C-X-C motif) ligand 6 also known as granulocyte chemotactic protein 2 (GCP-2); FGF-21, Fibroblast growth factor 21.

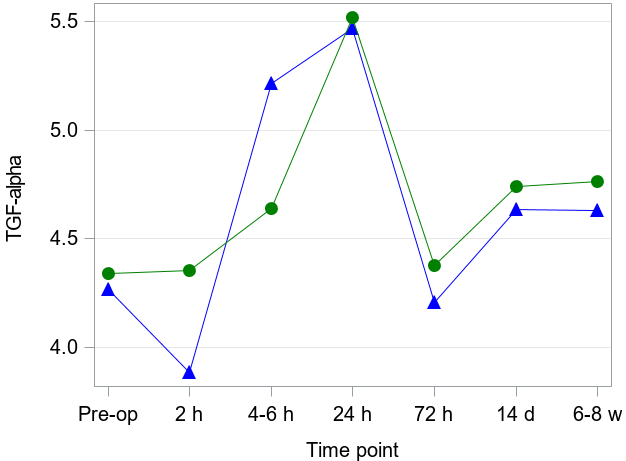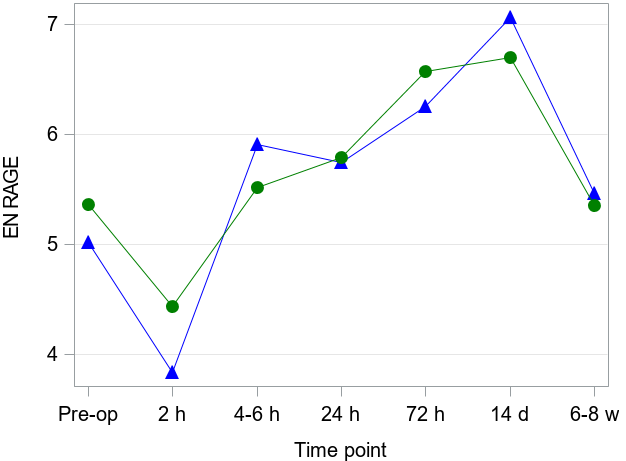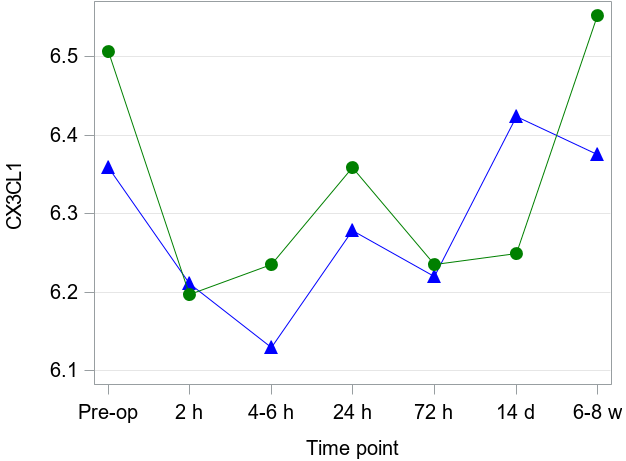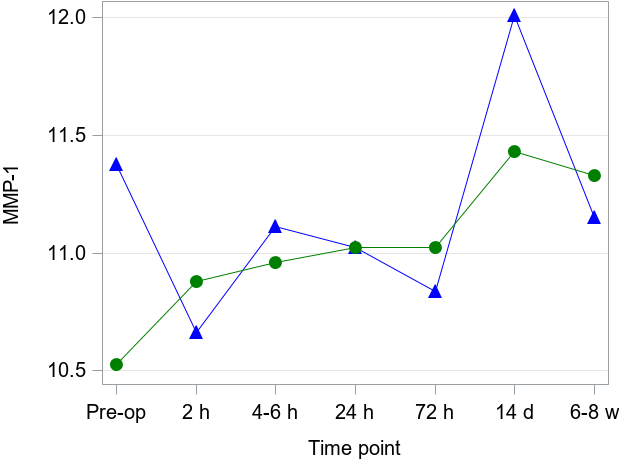

▲ LOW HRV ● HIGH HRV

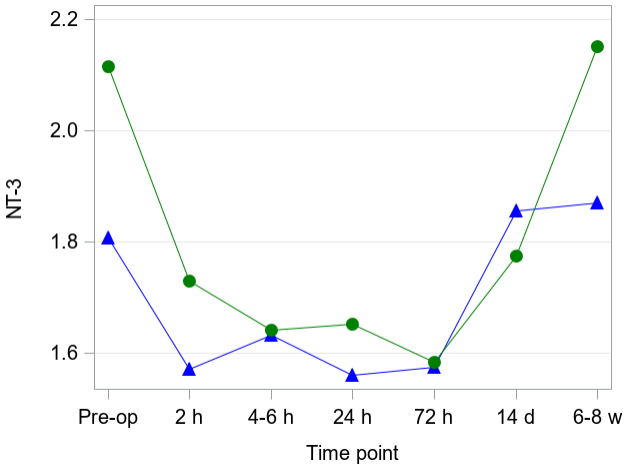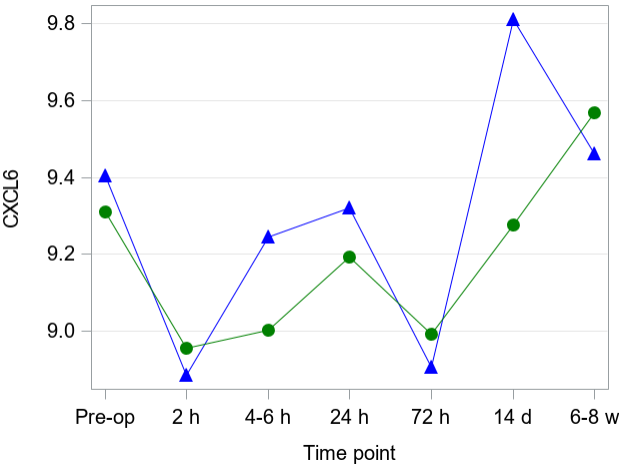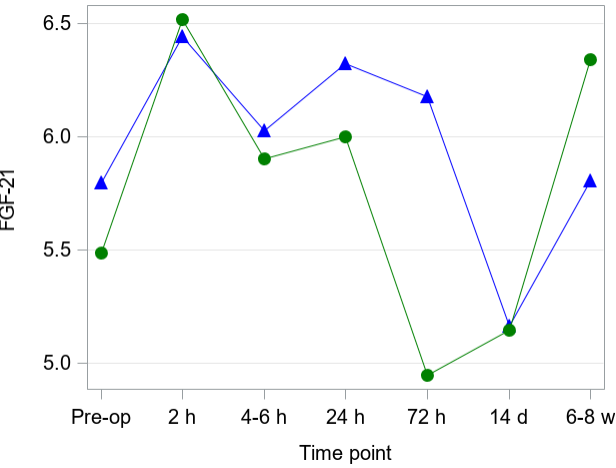

Supplement: DataSheet_4.pdf [file DataSheet_4.pdf]
